# Supplementary material
Source: PubMed Central journal article supplement (PMC3250132)
Supplement: 1114483108_pnas.201114483SI.pdf [file 1114483108_pnas.201114483SI.pdf]

# Supporting Information

Kim et al. 10.1073/pnas.1114483108

## SI Materials and Methods

**Construction of Transformation-Associated Recombination Cloning Vectors.** The transformation-associated recombination (TAR) circularizing vectors, pVC-NBS1 and pVC-VHL, which contain 5' and 3' sequences of the human *NBS1* and *VHL* genes, were constructed using the basic vector pVC604. The 307-bp ApaI-XmaI and 193-bp XmaI-XbaI fragments corresponding to 5' and 3' regions of *NBS1* were inserted into the polylinker of pVC604. ATG and stop codons are located approximately 5 kb upstream of the 5' hook and approximately 1.5 kb downstream of the 3' hook of *NBS1*. The 5' and 3' targeting sequences of *NBS1* were designed based on the available information (March 2006, NCBI36/hg18) and correspond to positions 91,070,470 to 91,070,776 and 91,015,482 to 91,015,674 on the chromosome 8 sequence. Size of the targeted genomic fragment containing the *NBS1* gene is 55,294 bp. The 214-bp XhoI-SmaI and 126-bp SmaI-XbaI fragments corresponding to 5' and 3' regions of *VHL* were inserted into the polylinker of pVC604. The 5' and 3' targeting sequences of *VHL* were developed based on the available information (March 2006, NCBI36/hg18) and correspond to positions 10,148,615 to 10,148,828 and 10,173,838 to 10,173,963 on chromosome 3. ATG and stop codons are located approximately 9.9 kb upstream of the 5' hook and approximately 7.3 kb downstream of the 3' hook of *VHL*. Size of the targeted genomic fragment containing the *VHL* gene is 25,348 bp. The targeting sequences were cloned into vector pVC604 in orientations corresponding to their orientations in the genome. The TAR vectors were linearized with XmaI or SmaI (the site is located between the targeting sequences) before transformation to yield a molecule bounded by the gene sequences.

**Yeast Strain and Transformation.** For transformations, the highly transformable *Saccharomyces cerevisiae* strain VL6-48 (MAT $\alpha$ , his3- $\Delta$ 200, trp1- $\Delta$ 1, ura3-52, lys2, ade2-101, met14) that has *HIS3* deleted was used. For cloning of genomic copies of the *NBS1* and *VHL* genes, aliquots (~60  $\mu$ L) containing approximately 2 to 3  $\mu$ g of high molecular weight human DNA were prepared, mixed with a linearized TAR vector (1  $\mu$ g), and presented to freshly prepared yeast spheroplasts. Yeast transformants were selected on synthetic complete medium plates lacking histidine. Ten transformation experiments were carried out, and approximately 1,000 colonies were obtained. (The yield of transformants per 2–3  $\mu$ g of human DNA using 1  $\mu$ g of vector and  $5 \times 10^8$  spheroplasts varied between 10 and 50.) To identify gene-containing clones, the transformants were combined into pools and examined with the diagnostic primers for the unique *NBS1* or *VHL* sequences not present in the vector by PCR (Table S1). Five to seven gene-positive pools were identified. The PCR products were sequenced and found to match the expected *NBS1* or *VHL* sequences. Individual clones containing the *NBS1* or *VHL* genes were found in each gene-positive pool and used for further analysis. The *NBS1* and *VHL* coding regions of TAR/YAC clones were examined by PCR with specific pairs of primers for gene exonic regions (Table S1).

**Construction of pJBRV1 Retrofitting Vector and Conversion of NBS1- and VHL-YACs into BACs Containing a loxP Site.** A diagram of the pJBRV1 vector and retrofitting of a circular YAC into a BAC is shown in Fig. S2. Vector pJBRV1 contains the 3' end of the *HPRT* gene, an eGFP cassette, a loxP sequence, and two short targeting hooks (~300 bp each), separated by the unique BamHI

site, that flank the *ColE1* origin of replication in the pVC604-based TAR cloning vector. The hooks are homologous to the vector sequences of pVC604. Recombination of the BamHI-linearized pJBRV1 vector with a YAC in yeast leads to replacement of the *ColE1* origin of replication in the TAR cloning vector by a cassette containing the F factor origin replication, the chloramphenicol acetyltransferase (*Cm*<sup>R</sup>) gene, and the *URA3* yeast selectable marker. A standard lithium acetate transformation procedure was used for retrofitting of YACs into BACs. YAC retrofitting was highly efficient: more than 95% of Ura<sup>+</sup> His<sup>+</sup> transformants obtained with pJBRV1 contained retrofitted YACs. The YAC/BACs were moved to *Escherichia coli* by electroporation. In brief, yeast chromosome-size DNAs were prepared in agarose plugs and, after melting and agarose treatment, the DNAs were electroporated into DH10B competent cells (Gibco/BRL) by using a Bio-Rad Gene Pulser.

**Physical Characterization of YAC and BAC Clones.** Several approaches were taken to establish the integrity and stability of the cloned material in the TAR isolates. To check the size of inserts in the gene-positive clones, chromosomal-size DNAs from yeast transformants and *E. coli* cells were digested with NotI, separated by clamped homogeneous electrical field electrophoresis, and stained with EtBr in the case of BACs or blotted and hybridized with the probes specific to either the *NBS1* or *VHL* gene in the case of YACs. To identify fragments containing *Alu* sequences (*Alu* profiles), 1  $\mu$ g of total yeast DNA was digested to completion with TaqI. Samples were resolved by gel electrophoresis, transferred to a nylon membrane, and hybridized with an *Alu* probe as described previously (1). To prove the presence of all exons in the *NBS1* and *VHL* genes after gene loading into the human artificial chromosome (HAC), each HPRT-positive clone was checked by PCR with exon-specific primers (Table S1). In addition, to demonstrate that the structure of the *NBS1* and *VHL* genomic segments remains intact after loading into the HAC, the *NBS1* and *VHL* gene sequences were re-TAR cloned from HACs maintained in CHO cells by using the same TAR vectors used for gene isolation from the human genome. Then, DNAs from these TAR isolates were digested by TaqI, resolved by gel electrophoresis, and hybridized with an *Alu* probe.

**Loading of Genomic Fragments into Unique loxP Site of Alphoid Tetracycline Operator HAC.** A total of 3 to 5  $\mu$ g of the BAC vector containing *VHL* or *NBS1* genes and 1 to 2  $\mu$ g of the Cre expression pCpG-iCre vector (2) were cotransformed into *hprt*-deficient CHO cells ( $10^5$ ) containing the alphoid tetracycline operator (alphoid<sup>tet<sup>O</sup></sup>)-HAC vector (3) by lipofection with FuGENE<sup>R</sup>HD transfection reagent (Roche) or Lipofectamine 2000 (Invitrogen). *HPRT*-positive colonies were selected after 2 to 3 wk growth in HAT medium. The number of colonies obtained for *VHL* was seven, with three for *NBS1*. Insertion of the genes was confirmed by genomic PCR with a specific pair of primers that diagnose reconstitution of the *HPRT* gene (Table S1). The *HPRT* gene was reconstituted in nine of 10 analyzed clones (90%), indicating a high efficiency of accurate gene loading.

**Microcell-Mediated Chromosome Transfer.** alphoid<sup>tet<sup>O</sup></sup>-HAC/*NBS1* and alphoid<sup>tet<sup>O</sup></sup>-HAC/*VHL* were transferred from CHO cells to GM07166 and renal carcinoma cell (RCC) 786-0 cell lines deficient for the *NBS1* and *VHL* genes, respectively, using a standard microcell-mediated chromosome transfer (MMCT) protocol

(4). Blasticidin (BS) was used to select resistant colonies. Typically, three to 10 BS<sup>R</sup> colonies were obtained in one MMCT experiment involving HAC transfer into the gene-deficient cells. At least three BS<sup>R</sup> clones were analyzed by FISH for each HAC. Based on FISH analysis, more than 90% of cells in the colony contained a HAC. In 95% of these cells, the HAC was maintained as one copy. Cotransfer of CHO chromosomes was never detected in our experiments using a sensitive PCR test for rodent *SINE* elements (Table S1).

**FISH Analysis.** FISH and immuno-FISH analyses were performed as previously described (5, 6). HAC-containing cells were cultured in medium with 0.1 mg/mL of colcemid (no. 15212-012; Invitrogen) for 3 h at 37 °C. Metaphase cells were trypsinized and collected by centrifugation for 5 min at 483 × *g*, treated in hypotonic solution (0.075 mM KCl) for 10 min at room temperature and fixed in methanol:acetic acid (3:1) solution. Cells were diluted to the appropriate density with fixative solution, spread onto precleaned slides (12-544-7; Fisher Scientific), and allowed to dry at room temperature, followed by baking in an oven for 3 h at 60 °C. Metaphase chromosomes on the slide were denatured by denaturation buffer: 70% formamide/2× SSC for 6 min at 78 °C. Samples were dehydrated through a 70%, 90%, and 100% ethanol series for 4 min each and left to air-dry. Dig-labeled (11093088910; Roche) and biotin-labeled (11093070910; Roche) probes in hybridization solution were denatured at 70 °C for 10 min and allowed to renature at 37 °C for 30 min. The hybridization mix probe was applied to the sample and incubated at 37 °C overnight. Slides were washed with 30% formamide/2× SSC four times for 5 min at 37 °C and rinsed with 2× SSC briefly. Hybridized samples were blocked with 5% skim milk/4× SSC for 1 h and subjected to the detection solution mixture: anti-digoxigenin-rhodamine Fab fragments (11207750910; Roche) and fluorescein avidin DN (A-3101; Vector Labs) in blocking solution for 45 min. Slides were washed with 4× SSC for 10 min. The metaphase chromosomes were washed with 0.1% Triton X-100/4× SSC for 10 min and rinsed with 4× SSC. The samples were counterstained with 1 mg/mL DAPI (D1306; Invitrogen) and mounted in Vectashield mounting medium (H1000; Vector Labs). Slides were analyzed by using fluorescence microscopy.

**Antibodies.** The following antibodies were used for immunoblotting and immunostaining: VHL (NB100-485), HIF2- $\alpha$  (NB100-122), CyclinD1 (RB9041), Cdk1 (sc-53), PGK1 (H00005230-A01), CA9 (NB100-417), NBS1 (NB100-60654), ATM (ab17995), ATM-S1981 (ab81292), KAP1 (ab10484), KAP1-S824 (ab70369), p53 (ab26), p53-S15 (cs9284),  $\gamma$ -H2A.X (ab18311), GFP (sc8334), and  $\beta$ -tubulin (NB600-936).

**tetO-HAC Elimination by Its Targeting with Chromatin Modifiers.** Transient expression of the tTS-tet-repressor fusion protein to induce the HAC loss was performed as previously described (3, 5). After transfection with the tTS fusion construct, neomycin-resistant clones were selected in the presence of doxycycline, conditions that support proper HAC segregation and HAC stability (the tTS cannot bind to tetO sites). The HAC elimination assay was then performed by transfer of the stable transfectants to media lacking doxycycline. After 48 h of culturing in the presence of neomycin (800  $\mu$ g/mL), a fraction of the HAC-less cells can be detected by loss of the GFP signal that is then confirmed by FISH. The cells that have lost the HAC were selected for the further analysis. Selection of the HAC-less clones takes approximately 2 to 3 wk. These clones were used for Western blot analysis to demonstrate that the loss of the HAC was accompanied by the restoration of the original mutant phenotypes.

**RT-PCR.** Transcription of the *VHL* gene from alphoid<sup>tetO</sup>-HAC/*VHL* in CHO and RCC 786-0 cell lines was detected by RT-PCR by using specific primers described in Table S1.

**$\gamma$ -Irradiation.** Exponentially growing GM07166 and GM07166 containing tetO-HAC/NBS1 cells were suspended to 5 × 10<sup>5</sup> cells/mL in complete medium. Aliquots of 10 mL were plated in 25-cm<sup>2</sup> flasks (Nunc) and, after 2 h, irradiated at room temperature by using a <sup>60</sup>Co  $\gamma$ -ray source at a dose rate of 3 Gy/min. After irradiation, flasks were placed in a 37 °C incubator and removed at various times following irradiation for analysis.

**ChIP Analysis.** ChIP with antibodies against CENP-A (mAN1), dimethyl histone H3 Lys4 (Upstate), trimethyl H3 Lys4 (Upstate), and trimethyl H3 Lys9 (Upstate) was carried out according to a previously described method (6) with minor modifications. Cultured cells were cross-linked in 0.5% formaldehyde for 5 min at 22 °C. After addition of 0.2 vol. of 2.5 M glycine and incubation for 5 min, fixed cells were washed with TBS buffer (25 mM Tris-Cl, 137 mM NaCl, 2 mM KCl, pH 7.4) twice and washed once with sonication buffer (20 mM Tris, pH 8.0, 1 mM EDTA, 1.5  $\mu$ M aprotinin, 10  $\mu$ M leupeptin, 1 mM DTT, and 40  $\mu$ M MG132). Next, cells were frozen in liquid nitrogen and stored at -80 °C until use. Soluble chromatin was prepared by sonication (Bioruptor sonicator; Cosmo Bio) to an average DNA size of 0.5 kb in sonication buffer and immunoprecipitated in IP buffer (20 mM Tris-HCl, pH 8.0, 600 mM NaCl, 1 mM EDTA, 0.05% SDS, 1.0% Triton X-100, 20% glycerol, 1.5  $\mu$ M aprotinin, 10  $\mu$ M leupeptin, 1 mM DTT, and 40  $\mu$ M MG132). Protein G sepharose (Amersham) blocked with BSA was added, and the antibody-chromatin complex was recovered by centrifugation. The recovery ratio of the immunoprecipitated DNA relative to input DNA was measured by real-time PCR using a CFX96 real-time PCR detection system (Bio-Rad) and iQ SYBR Green Supermix (Bio-Rad). Primers 5SDNA-F1 and 5SDNA-R1 for 5S ribosomal DNA, 11-10R and mCbox-4 for 11-mer of chromosome 21 alphoid DNA, Sat2-F1 and Sat2-R1 for pericentromeric satellite 2 repeat (8) tet-1 and tet-3 for the alphoid<sup>tetO</sup> DNA, and bsr-F and bsr-R for the marker gene (bsr) of alphoid<sup>tetO</sup> HAC (7) were described previously (6–8). Primers NBS1-vector-F3 and NBS1-R2 for the upstream region of NBS1 gene on alphoid<sup>tetO</sup> HAC and NBS1-F2 and NBS1-vector-R3 for the downstream region of NBS1 gene on alphoid<sup>tetO</sup> HAC are in Table S1.

**Cell Lines.** HT1080 human fibrosarcoma cells obtained from the American Type Culture Collection were cultured in Dulbecco modified Eagle medium (Sigma) supplemented with 10% FBS (Biowest) with 4  $\mu$ g/mL Blasticidin S (Funakoshi) at 37 °C in 5% CO<sub>2</sub>. The *HPRT*-deficient CHO cells (JCRB0218) were maintained in Ham F-12 nutrient mixture (Invitrogen) plus 10% FBS with 8  $\mu$ g/mL BS (Funakoshi). After introduction of a BAC construct containing a gene of interest and the eGFP gene, CHO cells retaining the tetO-eGFP-HAC were cultured with 1× HAT medium. The RCC 786-0 cell line containing a single *VHL* allele with a frameshift mutation at codon 104 (9) was obtained from Len Neckers (National Cancer Institute, Bethesda, MD). HIF1- $\alpha$  is not expressed in the 786-0 cell line as a result of a spontaneous mutation (10). The GM07166 cell line containing a deletion of 5 nt in exon 6 of the *NBS1* gene, resulting in a frameshift and a truncated protein, was obtained from the Coriell Institute for Medical Research.

**Statistical Analysis.** *P* values were calculated by using a Student *t* test. The *P* values of enrichment levels of rDNA and Sat2 with anti-CENP-A (Fig. 5A) are more than 0.05, which means there is no significant difference in the enrichment levels of rDNA and Sat2 in three tested cell lines.

| Target | Cell line 1 | Cell line 2 | P Value |
|--------|-------------|-------------|---------|
| rDNA   | AB2.2.18.21 | NBS1 no. 3  | 0.456   |
| rDNA   | AB2.2.18.21 | NBS1 no. 6  | 0.428   |
| rDNA   | NBS1 no. 3  | NBS1 no. 6  | 0.323   |
| Sat2   | AB2.2.18.21 | NBS1 no. 3  | 0.360   |
| Sat2   | AB2.2.18.21 | NBS1 no. 6  | 0.276   |
| Sat2   | NBS1 no. 3  | NBS1 no. 6  | 0.281   |

The *P* values of enrichment levels of 5' and 3' ends of NBS1 with CENP-A antibody indicate that the enrichment of CENP-A is statistically significant in both HAC-containing lines.

| Cell line | Target 1   | Target 2   | P value |
|-----------|------------|------------|---------|
| NBS1#3    | 5' of NBS1 | 3' of NBS1 | 0.019   |
| NBS1#6    | 5' of NBS1 | 3' of NBS1 | 0.048   |

The *P* values of enrichment levels of rDNA and Sat2 with anti-H3K9me3 are more than 0.05 that means that there is no significant difference in the enrichment levels of rDNA and Sat2 in the tested three cell lines.

| Target | Cell line 1 | Cell line 2 | P value |
|--------|-------------|-------------|---------|
| rDNA   | AB2.2.18.21 | NBS1#3      | 0.091   |
| rDNA   | AB2.2.18.21 | NBS1#6      | 0.462   |
| rDNA   | NBS1#3      | NBS1#6      | 0.140   |
| Sat2   | AB2.2.18.21 | NBS1#3      | 0.230   |
| Sat2   | AB2.2.18.21 | NBS1#6      | 0.067   |
| Sat2   | NBS1#3      | NBS1#6      | 0.240   |

The *P* values of enrichment levels of 5' and 3' ends of NBS1 with H3K9me3 antibody indicates that the enrichment of H3K9me3 is statistically significant in both HAC-containing lines.

| Cell line | Target 1   | Target 2   | P value |
|-----------|------------|------------|---------|
| NBS1#3    | 5' of NBS1 | 3' of NBS1 | 0.008   |
| NBS1#6    | 5' of NBS1 | 3' of NBS1 | 0.017   |

- Larionov V, Kouprina N, Solomon G, Barrett JC, Resnick MA (1997) Direct isolation of human BRCA2 gene by transformation-associated recombination in yeast. *Proc Natl Acad Sci USA* 94:7384–7387.
- Kim JH, et al. (2009) Human gamma-satellite DNA maintains open chromatin structure and protects a transgene from epigenetic silencing. *Genome Res* 19:533–544.
- Iida Y, et al. (2010) Human artificial chromosome with a conditional centromere for gene delivery and gene expression. *DNA Res* 17:293–301.
- Kazuki Y, et al. (2010) Complete genetic correction of iPS cells from Duchenne muscular dystrophy. *Mol Ther* 18:386–393.
- Cardinale S, et al. (2009) Hierarchical inactivation of a synthetic human kinetochore by a chromatin modifier. *Mol Biol Cell* 20:4194–4204.

In Fig. 3D, the differences in foci numbers at 24 h and 48 h are statistically significant. The results were reproduced in three independent experiments. The *P* value for each time period was calculated between GM07166 and GM07166+NBS1 HAC (+) by using a Student *t* test. The *P* values for samples at 0 h, 24 h, and 48 h were less than 0.05, which means they are statistically significant.

#### GM07166 vs. GM07166 + NBS1 HAC (+)

| Time | P value |
|------|---------|
| 0 h  | 0.009   |
| 1 h  | 0.229   |
| 2 h  | 0.309   |
| 3 h  | 0.674   |
| 6 h  | 0.105   |
| 24 h | 0.018   |
| 48 h | 0.018   |

The *P* values between every pairing were also calculated: GM07166

| Time | 1 h    | 2 h    | 3 h    | 6 h    | 24 h   | 48 h                              |
|------|--------|--------|--------|--------|--------|-----------------------------------|
| 0 h  | 0.0004 | 0.0060 | 0.0100 | 0.0002 | 0.0067 | 0.1100                            |
| 1 h  | —      | 0.1224 | 0.0785 | 0.1212 | 0.0033 | 0.0000 (2.35 × 10 <sup>-6</sup> ) |
| 2 h  | —      | —      | 0.0794 | 0.0178 | 0.0058 | 0.0001                            |
| 3 h  | —      | —      | —      | 0.0064 | 0.0127 | 0.0001                            |
| 6 h  | —      | —      | —      | —      | 0.0032 | 0.0030                            |
| 24 h | —      | —      | —      | —      | —      | 0.0015                            |

#### GM07166 + NBS1 HAC (+)

| Time | 1 h    | 2 h    | 3 h    | 6 h    | 24 h   | 48 h                              |
|------|--------|--------|--------|--------|--------|-----------------------------------|
| 0 h  | 0.0006 | 0.0001 | 0.0069 | 0.0066 | 0.0248 | 0.0827                            |
| 1 h  | —      | 0.1720 | 0.0095 | 0.2192 | 0.0018 | 0.0007                            |
| 2 h  | —      | —      | 0.1017 | 0.0136 | 0.0002 | 0.0001 (6.46 × 10 <sup>-5</sup> ) |
| 3 h  | —      | —      | —      | 0.0266 | 0.0122 | 0.0075                            |
| 6 h  | —      | —      | —      | —      | 0.0099 | 0.0062                            |
| 24 h | —      | —      | —      | —      | —      | 0.0204                            |

- Nakano M, et al. (2008) Inactivation of a human kinetochore by a specific targeting of chromatin modifiers. *Dev Cell* 14:1–16.
- Nakano M, Okamoto Y, Ohzeki J, Masumoto H (2003) Epigenetic assembly of centromeric chromatin at ectopic alpha-satellite sites on human chromosomes. *J Cell Sci* 116:4021–4034.
- Nakashima H, et al. (2005) Assembly of additional heterochromatin distinct from centromere-kinetochore chromatin is required for de novo formation of human artificial chromosome. *J Cell Sci* 118:5885–5898.
- Gnarra JR, et al. (1994) Mutations of the VHL tumour suppressor gene in renal carcinoma. *Nat Genet* 7:85–90.
- Maxwell PH, et al. (1999) The tumour suppressor protein VHL targets hypoxia-inducible factors for oxygen-dependent proteolysis. *Nature* 399:271–275.











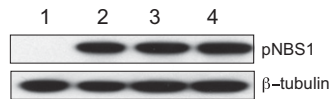

**Fig. S8.** Expression of pNBS1 from the HAC in NBS1-deficient cells. Western blot analysis of NBS1-deficient GM07166 cells containing a common deletion of 5 nt in exon 6 of the *NBS1* gene and the same cells carrying aliphoid<sup>tetO</sup>-HAC/NBS1 after 1, 2, and 3 mo of culturing.  $\beta$ -Tubulin was used as an internal control. Lane 1, GM07166 cell line; lane 2, GM07166 with aliphoid<sup>tetO</sup>-HAC/NBS1 after 1 mo; lane 3, GM07166 with aliphoid<sup>tetO</sup>-HAC/NBS1 after 2 mo; and lane 4, GM07166 with aliphoid<sup>tetO</sup>-HAC/NBS1 after 3 mo.

**Table S1. Primers used in this study**

Primers for pVC-NBS1 vector construction

5' hook NBS-F1/NBS-R1 5' CTAGCCTAGAACCTGTTCATG 3'/5' GGTCTGCTTATTGCTCCATG 3'  
3' hook NBS-F2/NBS-R2 5' TGACATTGGATAGAACATGGG 3'/5' GATTGTGGGCATGACAGAGA 3'

Diagnostic primers

E1-F/E1-R 5' TCATCCAAGGCAGCCTGCGT 3'/5' TGCCATACAGCGTACTCGCC 3'  
E2-F/E2-R 5' CGTGTACATGTGTATGTGTC 3'/5' GATTTCAACCCCTTACTGG 3'  
E3-F/E3-R 5' CTCTGAGAAGTGAATGTACTG 3'/5' TGGCTGAAACAAAGCTGTCC 3'  
E4-F/E4-R 5' CTGCAACTCTGATACTATGAC 3'/5' TCTGTGTATAGTGGGTAAGC 3'  
E5-F/E5-R 5' ATGTAAACAGCCTCTTTGTAG 3'/5' CTATCATATAAGTGACATCTT 3'  
E6-F/E6-R 5' GTGTCAGATAGTCACTCCG 3'/5' CGTTAACAACACTGATAAGAG 3'  
E7-F/E7-R 5' CCAAATCAAATCTTATGTGTTT 3'/5' CATAAAATCTCCTACTTGCAG 3'  
E8-F/ E8-R 5' TGCTTTATCTTGACATTATCTG 3'/5' CTAGCAAGTATATGAGTAACG 3'  
E9-F/E9-R 5' GATGTTTCATCTTCTATCTAGC 3'/5' GATAAAGGGCATTACTTCTG 3'  
E10-F/E10-R 5' CTATTAAGTTGCTGTAACCTG 3'/5' TTAGTTGGTGAAAGCTGATAG 3'  
E11-F/E11-R 5' CTAAATGTTACTTAGCTGTG 3'/5' TTCTATGGCCACATCATCCA 3'  
E12-F/E12-R 5' CAAAAGGCCAAGAAGTGATAG 3'/5' ATTGATGAGATGACAGTCCC 3'  
E13-F/E13-R 5' GATCCCAAATGACAAGTGAC 3'/5' GTTTAGCATCACTGGTATCTC 3'  
E14-F/E14-R 5' GTTAATATGATTTACTGTACTAC 3'/5' ACCATAATGGACCAAAGTGC 3'  
E15-F/E15-R 5' ACTATATATTCACCACTGAGC 3'/5' GAAGGGACTAGGTGTCTATG 3'  
E16-F/ E16-R 5' TACAGTTTGAAAGTCTTTACC 3'/5' AGATGCAATGACAAAGCCTG 3'

Exon polymorphism checking primers

Exon 2F-Exon 13R 5' GGCAGGAGGAGAACCATACA 3'/5' TCCTCAATGATGTGTGGAA 3'  
Seq exon 2F1 5' GGCAGGAGGAGAACCATACA 3'  
Seq exon 2F2 5' GTCTAGCAGCCCGGTTAC 3'  
Seq exon 5F 5' TTGGTTGCATGCTCTTCTG 3'  
Seq exon 10F 5' CACAAGGCGTGTGAGTTGAT 3'  
Seq exon 13R 5' TCCTCAATGATGTGTGGAA 3'  
Seq exon 14R2 5' TCCTGCCTTAGCCACTCTTC 3'

Primers for pVC-VHL vector construction

5' hook VHL-F1/VHL-R1 5' CCCAGTCAAGTGCAGAGCCAC 3'/5' CGTAGCAAGCTCAAAGGAGCCA 3'  
3' hook VHL-F2/VHL-R2 5' TGGATTACCCTGGCGTGAGCA 3'/5' GGGGGTGAAATCCTGGAGGC 3'

Diagnostic primers for RT-PCR

dia1-F/dia1-R 5' TGCTTCAGTGTGGCTTTCACAAACA 3'/5' TGCAGTGAAGTTGATACCACATTGCT 3'  
diag2-F/diag2-R 5' ACACCTAAACTGCCTGCCCA 3'/5' CTCAGGCCCCAGGATTCA 3'  
E1-F/E1-R 5' GCCCTGAAGAAGACGGCGGG 3'/5' CAGGCGGCAGCGTTGGGTAG 3'  
E2-F/E2-R 5' GTCACCTTTGGCTCTTCAGAGATGC 3'/5' CTGGCAGTGTGATATTGGCAAAAATAG 3'  
E3-F/E3-R 5' TCAATCTCCCATCCGTTGATGTG 3'/5' TGTATACTGAAAGAGCGATGCCTC 3'  
RT full F/RT full R 5' ATGCCCGGAGGGCGGAGAAC 3'/5' TCAATCTCCCATCCGTTGATGTG 3'  
RT WT F/RT WT R 5' AACGCTGCCGCTGGCACG 3'/5' TCAATCTCCCATCCGTTGATGTG 3'  
VHlex1F/VHlex3f 5' GCCCTGAAGAAGACGGCGGG 3'/5' TCAATCTCCCATCCGTTGATGTG 3'  
VHlex1F/VHlex1R 5' GCCCTGAAGAAGACGGCGGG 3'/5' CAGGCGGCAGCGTTGGGTAG 3'  
VHlex2rev/VHlex3f 5' GTCACCTTTGGCTCTTCAGAGATGC 3'/5' TCAATCTCCCATCCGTTGATGTG 3'  
VHLstart/ VHlex1R 5' ATGCCCGGAGGGCGGAGAAC 3'/5' CAGGCGGCAGCGTTGGGTAG 3'

Primers for NotI site insertion

NotI F 5' AGATCACCGGTAACGGAGCTGAATGAAGCATGCGGCCGATGGGTCTGGAGCGTGAGCACCGGTATGCA 3'  
NotI R 5' TGCATACCGGTGCTCACGCTCCAGACCCATCGCGCCGATGCTTCATTACAGCTCCGTTACCGGTGATCT 3'

Primers for CHO DNA contamination after MMCT

Cons B2 5' CCATCTGTAATGAGATCTGATGC 3'  
Ham B2-F/Ham B2-R 5' GCTCAGAGTTAAGAGCACTGAC 3'/5' TGCTCCATGTATATCTGCACAC 3'

Primers for HPRT reconstitution

Lox137-R/Rev no 6 5' AGCCTTCTGTACACATTTCTTCTC 3'/5' GCTCTACTAAGCAGATGGCCACAGAAGCTAG 3'  
Lox137-R/SV40 PA 5' AGCCTTCTGTACACATTTCTTCTC 3'/5' AATGTTTACAAATAAAGCAATAGCATCAC 3'

Primers for ChIP analysis of 5' and 3' ends of the NBS1 gene in tetO-HAC

NBS1-vector-F3/NBS1-R2 5' AGCGGATAACAATTTACACAGGA 3'/5' GGGTCTTGACAGAGTCTTCCC 3'  
NBS1-F2/NBS1-vector-R3 5' TCATAATTACCAAGTGAAGCTGGTGG 3'/5' CACGACGTTGAAAACGACGGC 3'
